# Supplementary material for: LPS-induced systemic inflammation is suppressed by the PDZ motif peptide of ZO-1via regulation of macrophage M1/M2 polarization
Source: eLife journal article supplement (doi:10.7554/elife.95285), 2024-04-12

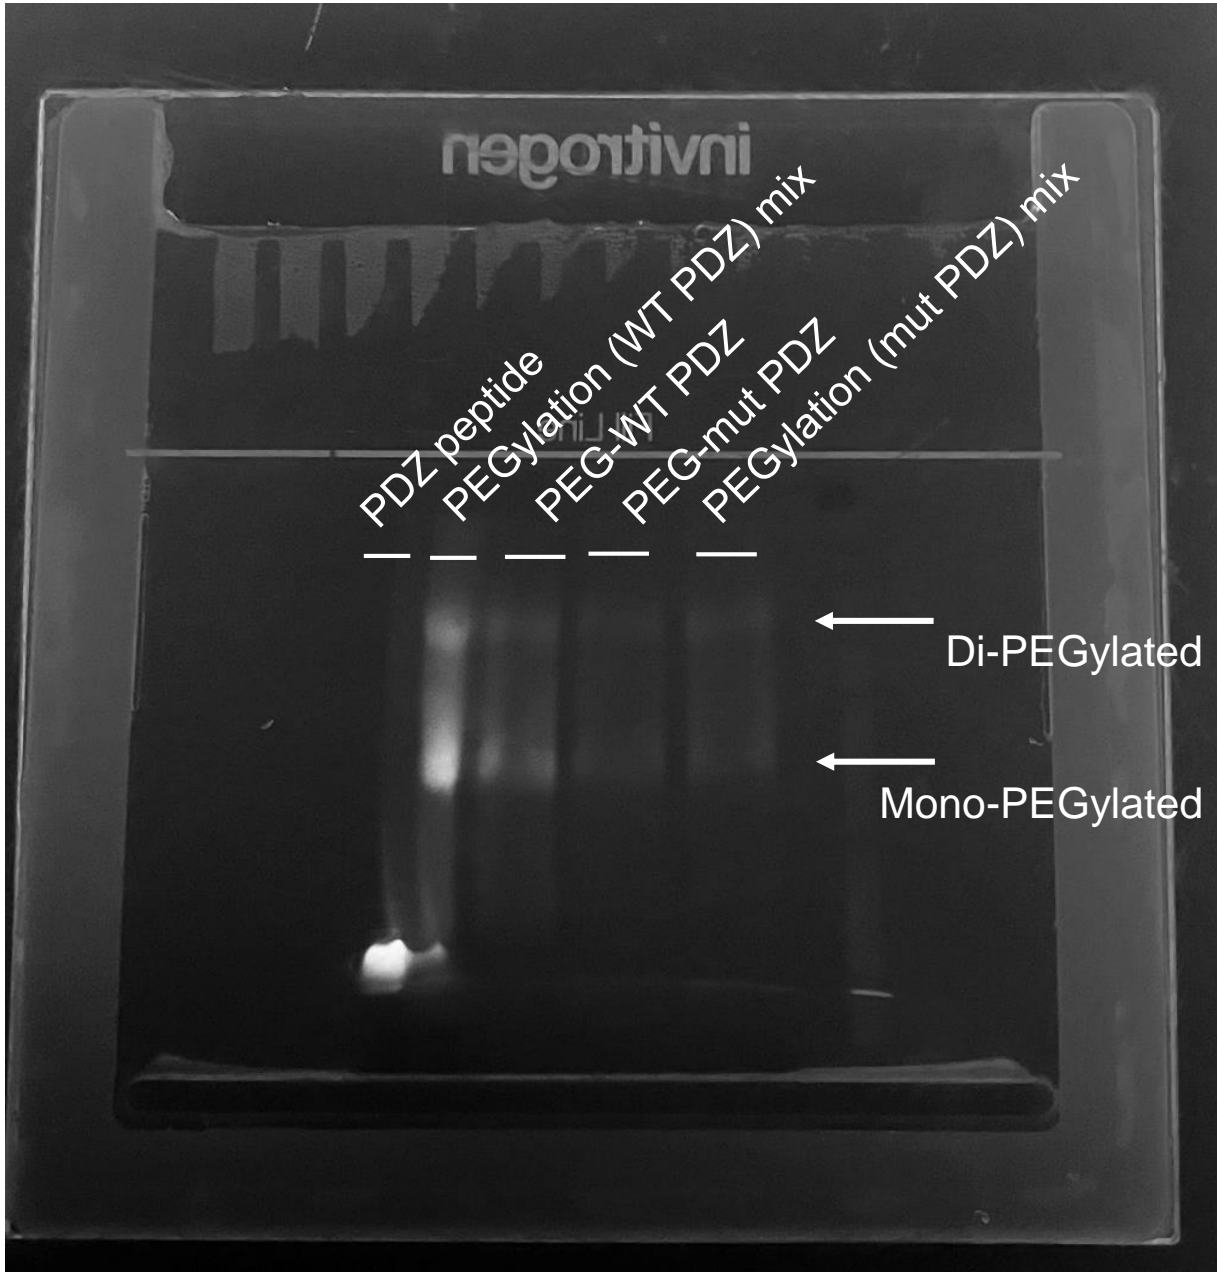

Supplement: fig1-data1 [file elife-95285-fig1-data1-v1.pdf]
